# Supplementary material
Source: publisher figshare collection journal article supplement (https://acs.figshare.com/ndownloader/files/14212418)
Supplement: Supplementary file 1 [file 14212418]

# Supporting Information S1:

Title: A Case Study and Methodology for OpenSWATH Parameter Optimization Using the ProCan90 Data Set and 45,810 Computational Analysis Runs

Authors: <sup>1</sup>Sean Peters, <sup>1,2</sup>Peter G Hains, <sup>1</sup>Natasha Lucas, <sup>1</sup>Phillip J Robinson, <sup>1</sup>Brett Tully

<sup>1</sup> ProCan, Children's Medical Research Institute, Faculty of Medicine and Health, University of Sydney, Westmead, NSW 2145, Australia

<sup>2</sup> Cell Signalling Unit, Children's Medical Research Institute, The University of Sydney, Westmead, NSW 2145, Australia

Email: btully@cmri.org.a

## Notebooks.zip

- analysis\_report.html  
The primary analysis python notebook supporting this work
- analysis\_report\_with\_d\_scores.html  
A replication of the analysis\_report.ipynb notebook, but with all m\_score metrics, plots and rank weighting replaced with d\_scores. NOTE: FDR filtering still uses m\_scores
- data-description.html  
A short notebook which is used to provide an overview of the result files captured from the large scale AWS Batch run
- manual-chrom-validation.html  
Some example chromatograms and peak groups found by each of the three parameter sets.
- ovarian\_analysis.html  
The analysis notebook for the ovarian dataset we used to validate our newly suggested parameter sets
- navarro\_plots\_and\_comments.html  
Comments and plots from our LFQBench run on HYE110 and HYE124 with our newly suggested parameter sets
- comments\_plots/  
Some of the plots captured from LFQBench on HYE110 and HYE124 with our newly suggested parameter sets

aws\_scripts.zip

The complete set of python scripts used to run our parallel OpenSWATH instances through AWS Batch
